# Supplementary material
Source: PubMed Central journal article supplement (PMC10872882)
Supplement: NIHMS1942451-supplement-SI_figures.pdf [file NIHMS1942451-supplement-SI_figures.pdf]

# Supplementary Figures and Tables

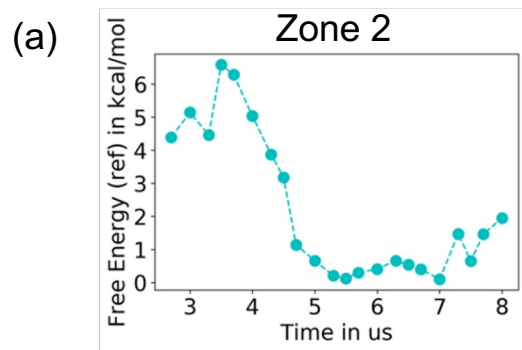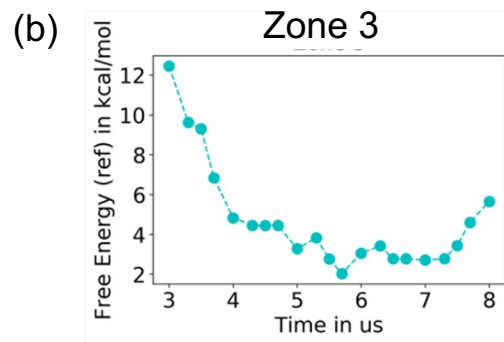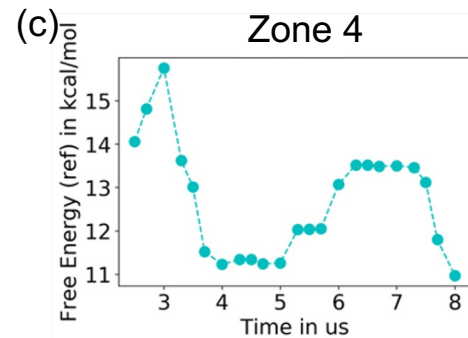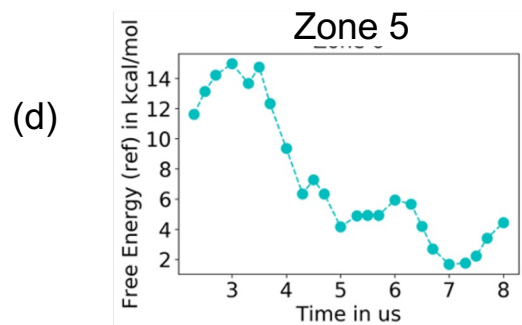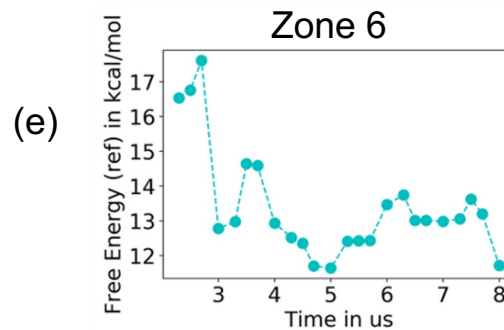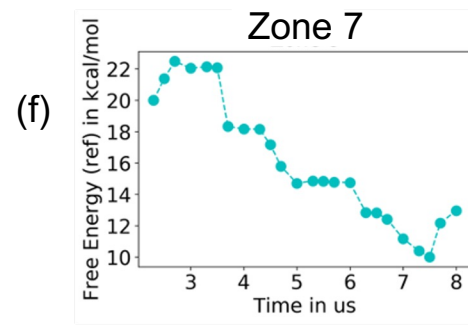

**Figure S1: Convergence plots: free energies in different zones for WT system plotted against aggregate metadynamics time.**

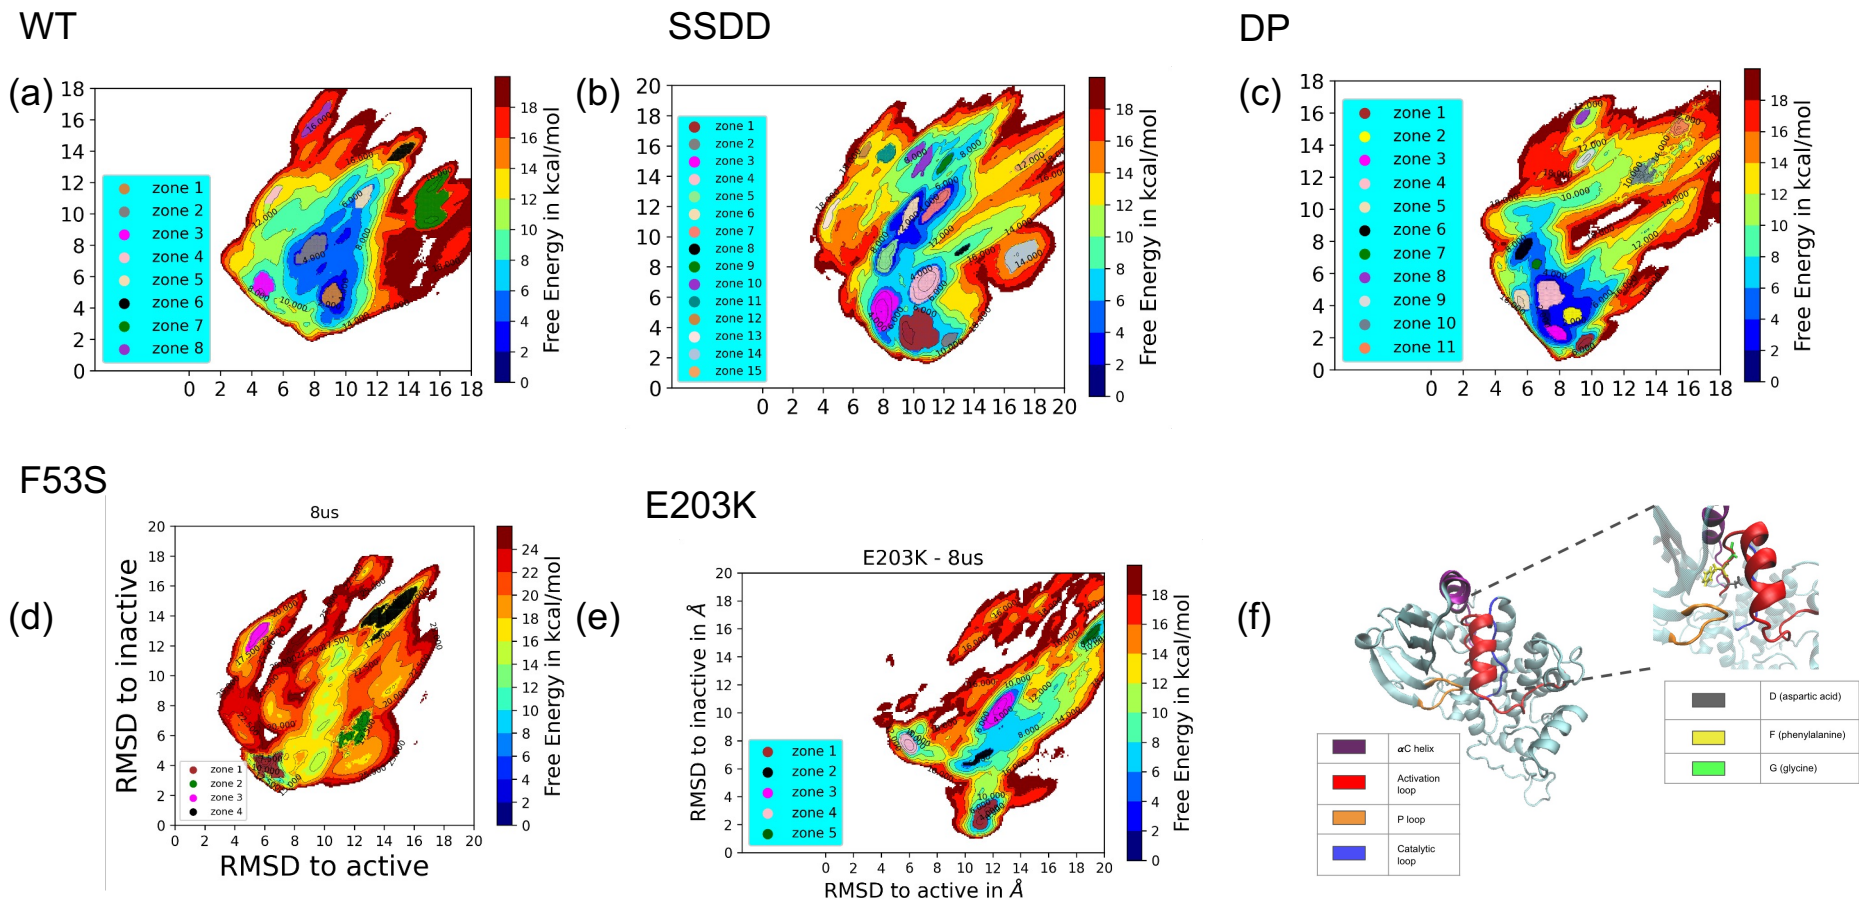

**Figure S2: Free energy landscapes with zones of interest for MEK1 WT, SSDD, E203K, F53S, and di-phosphorylated systems.**

Structure from zone

KE salt bridge histogram

DFG flip  
C207(C $\alpha$ )-C207(C $\beta$ )-D208(C $\alpha$ )-D208(C $\gamma$ )

Hbond of A-loop

Feature

Zone 1

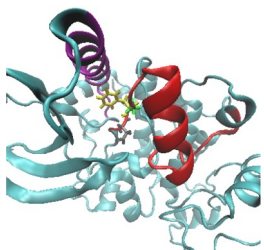

[0,0,0]

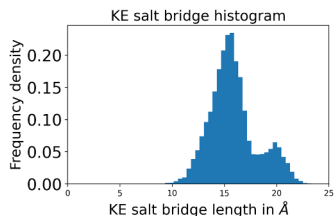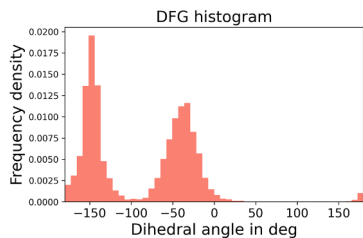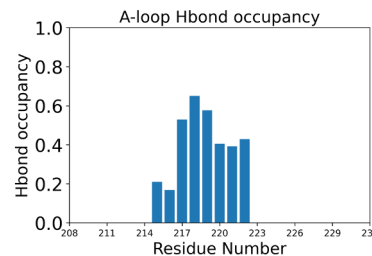

Free energy = 0.66 kcal/mol  
Remarks: **Most Inactive (most stable)**  
KE salt bridge broken(**I**)  
DFG out(**I**) (**Dout,low, Fin**)  
A-loop partially helical(**I**)

Zone 2

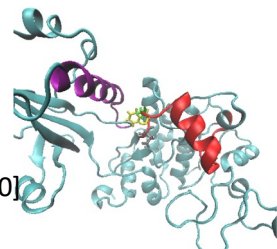

[1,0.5,0]

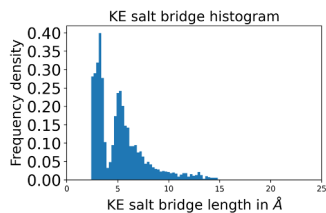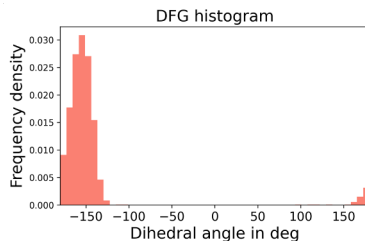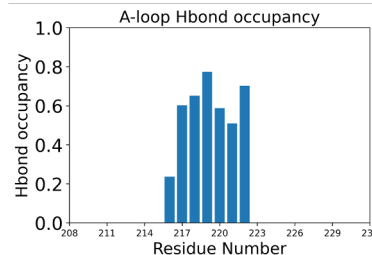

Free energy = 2.35 kcal/mol  
Remarks: KE salt bridge formed (**A**)  
DFG out(**I**) (**Dout,low, Fin**)  
A-loop partially helical(**I**)

Zone 3

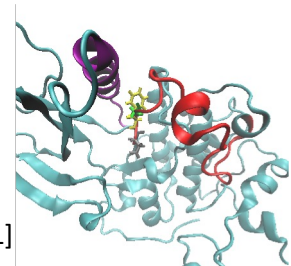

[0.5,0,1]

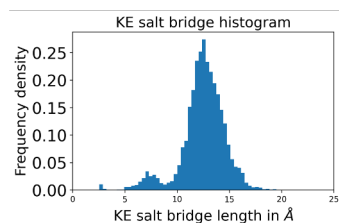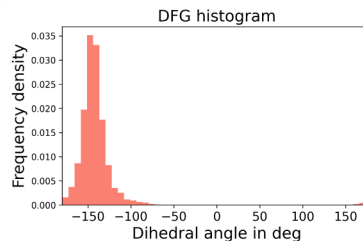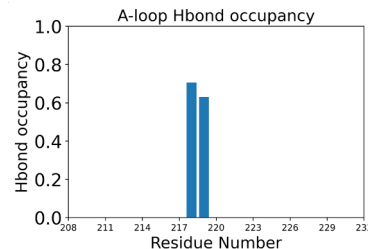

Free energy = 6.28 kcal/mol  
Remarks: KE salt bridge broken(**I**)  
DFG out(**I**) (**Dout,low, Fin**)  
A-loop unfolded(**A**)

## Structure from zone

## KE salt bridge histogram

DFG flip  
C207(C $\alpha$ )-C207(C $\beta$ )-D208(C $\alpha$ )-D208(C $\gamma$ )

## Hbond of A-loop

## Feature

Zone 4

[0.5,0.5,0]

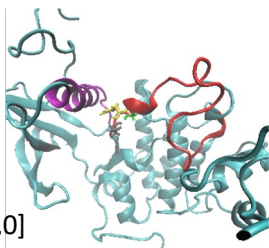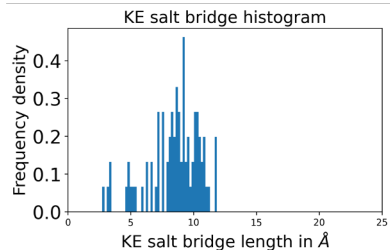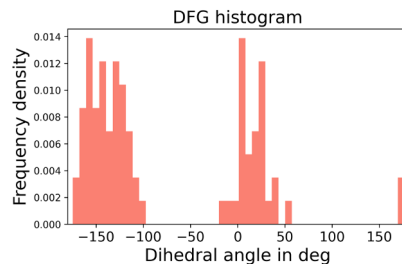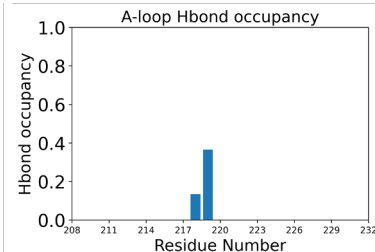

Free energy = 11.6 kcal/mol  
Remarks: KE salt bridge broken(**I**)  
DFG mid(**I/A**)  
(**Din,low, Fin**)  
A-loop unfolded(**A**)

Zone 5

[0,1,1]

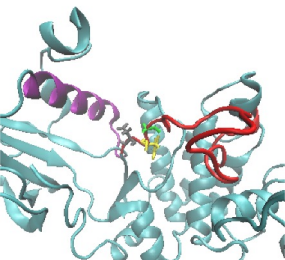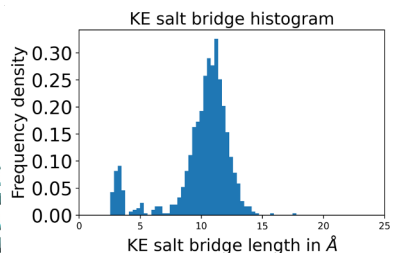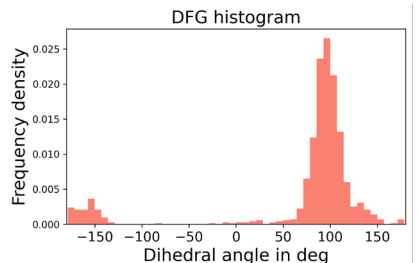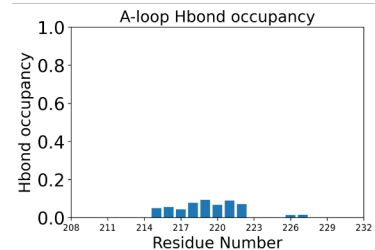

Free energy = 5.08 kcal/mol  
Remarks: KE salt bridge broken(**I**)  
DFG in(**A**) (**Din,up, Fout**)  
A-loop unfolded(**A**)

Zone 6

[0.5,1,1]

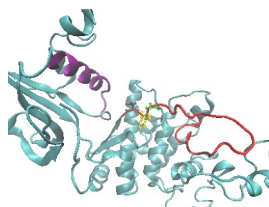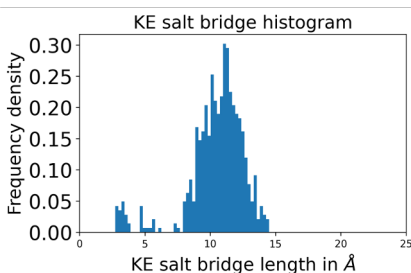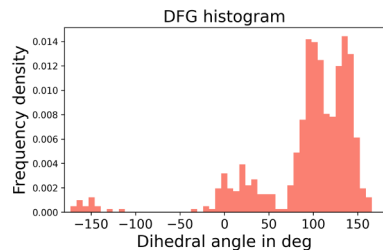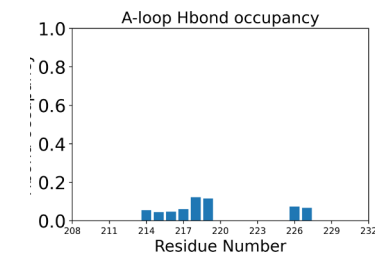

Free energy = 12.36 kcal/mol  
Remarks: KE salt bridge broken(**I**)  
DFG in(**A**) (**Din,up, Fout**)  
A-loop unfolded(**A**)

Structure from zone

KE salt bridge histogram

DFG flip

C207(C $\alpha$ )-C207(C $\beta$ )-D208(C $\alpha$ )-D208(C $\gamma$ )

Hbond of A-loop

Feature

Zone 7

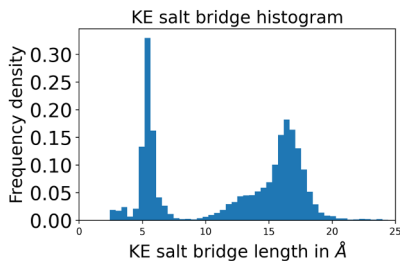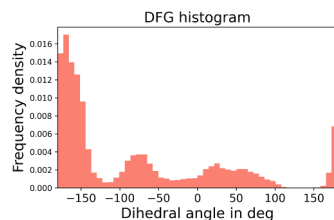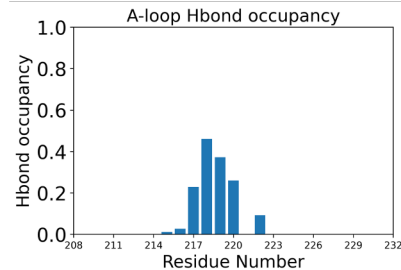

Free energy = 13.51 kcal/mol  
Remarks: **Most active**  
KE salt bridge broken/formed(**I/A**)  
DFG in(**A**) (**Din,low, Fout**)  
A-loop unfolded(**A**)

[0.5,1,1]

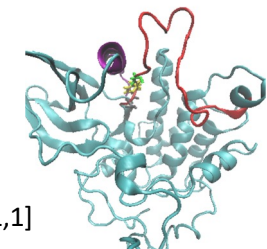

Zone 8

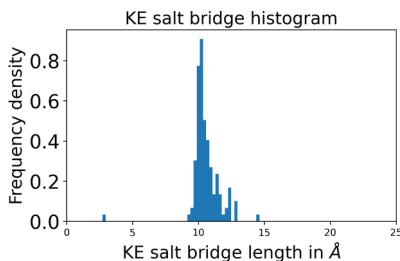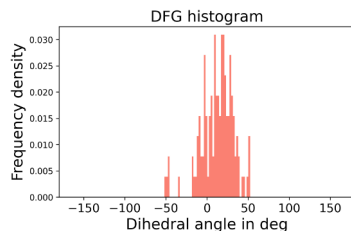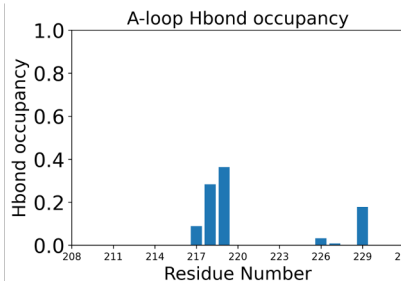

Free energy = 15.08 kcal/mol  
Remarks: KE salt bridge broken(**I**)  
DFG in(**A**) (**Din,low, Fout**)  
A-loop unfolded(**A**)

[0,1,1]

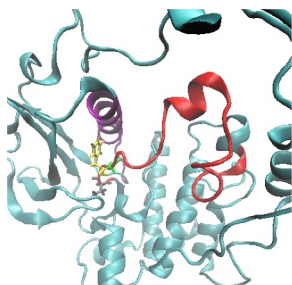

Note: (**I**) denotes inactive feature and (**A**) denotes active feature

**Fig. S3: MEK1 WT structures and their structural characteristics across zones**

Structure from zone

KE salt bridge histogram

DFG flip  
C207(C $\alpha$ )-C207(C $\beta$ )-D208(C $\alpha$ )-D208(C $\gamma$ )

Hbond of A-loop

Feature

Zone 1

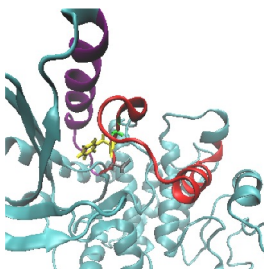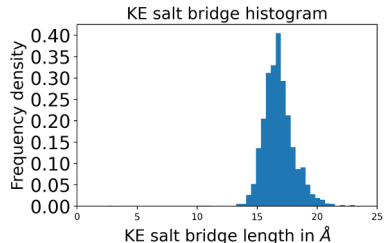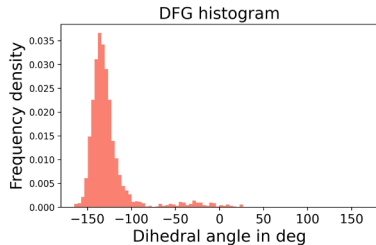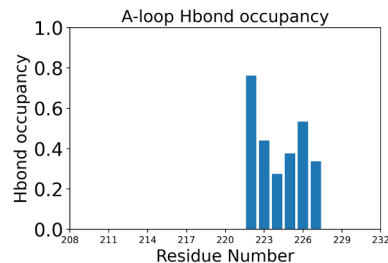

Free energy = 3.46 kcal/mol  
Remarks: **Most Inactive**  
KE salt bridge broken(**I**)  
DFG out(**I**) (**Dout,low, Fin**)  
A-loop partially helical(**I**)

[0,0,0]

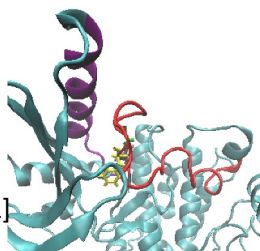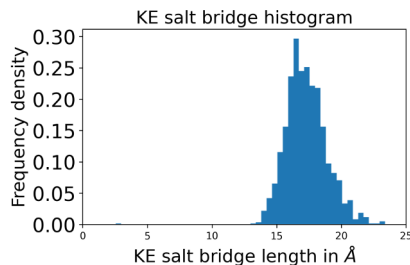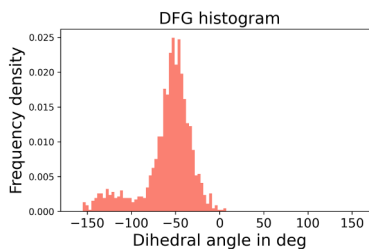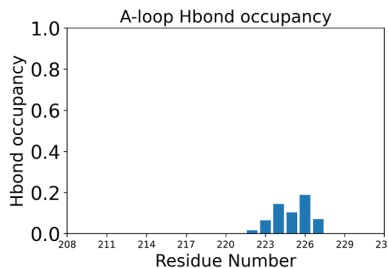

Free energy = 5.38 kcal/mol  
Remarks: KE salt bridge broken(**I**)  
DFG mid(**I/A**) (**Din, up, Fin**)  
A-loop unfolded(**A**)

[0,0.5,1]

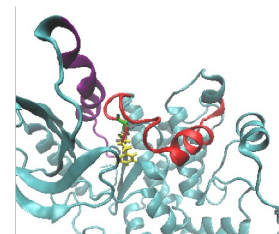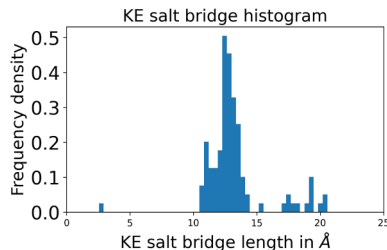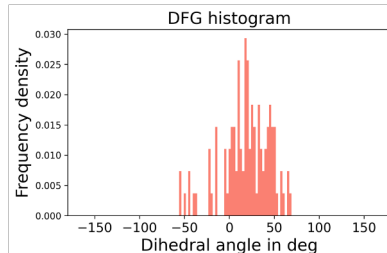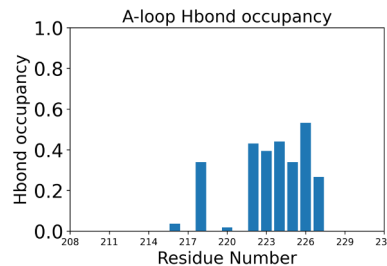

Free energy = 0.79 kcal/mol  
Remarks: **Most stable**  
KE salt bridge broken(**I**)  
DFG out(**I/A**) (**Din,up, Fmid**)  
A-loop partially helical(**I**)

[0,0.5,0]

Structure from zone

KE salt bridge histogram

DFG flip

C207(C $\alpha$ )-C207(C $\beta$ )-D208(C $\alpha$ )-D208(C $\gamma$ )

Hbond of A-loop

Feature

Zone 4  
[0,0,0]

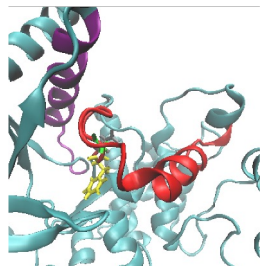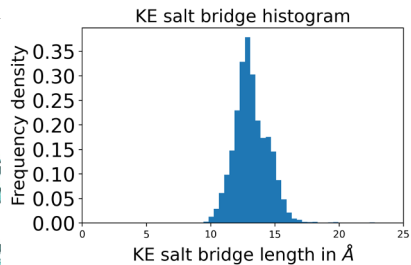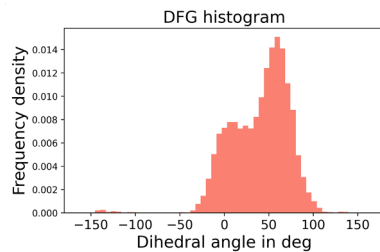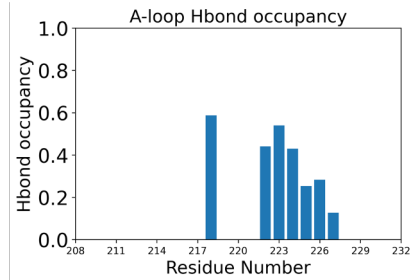

Free energy = 0.90 kcal/mol  
Remarks: KE salt bridge broken(I)  
DFG out(I) (Dout,up, Fin)  
A-loop partially helical(I)

Zone 5  
[0,1,0]

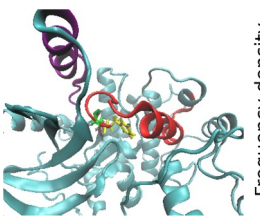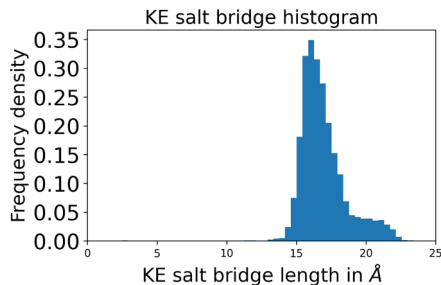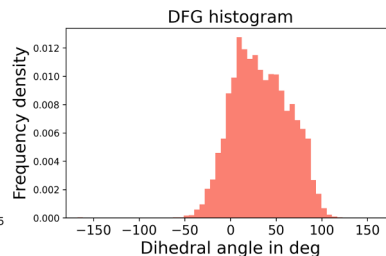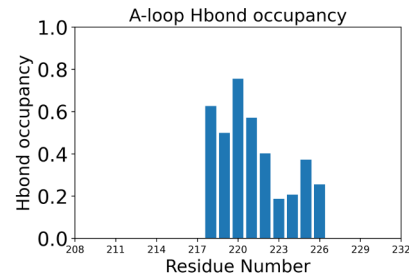

Free energy = 1.22 kcal/mol  
Remarks: KE salt bridge broken(I)  
DFG in(A) (Din,up, Fout)  
A-loop partially helical(I)

Zone 6  
[0,1,0]

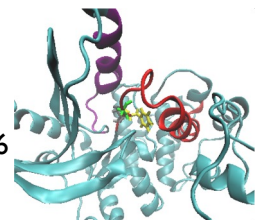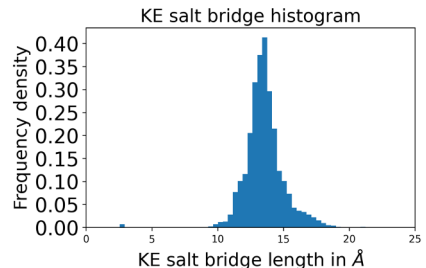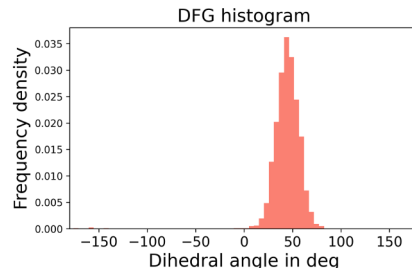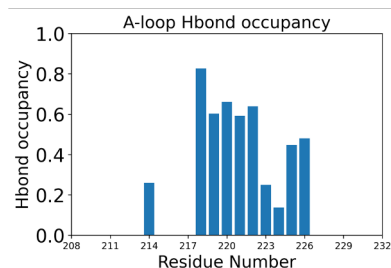

Free energy = 0.85 kcal/mol  
Remarks: KE salt bridge broken(I)  
DFG in(A) (Din,up, Fout)  
A-loop partially helical(I)



Structure from zone

Zone 7

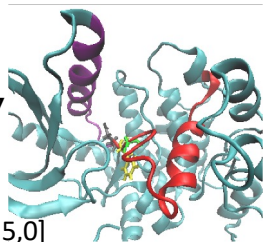

[0.5,0.5,0]

KE salt bridge histogram

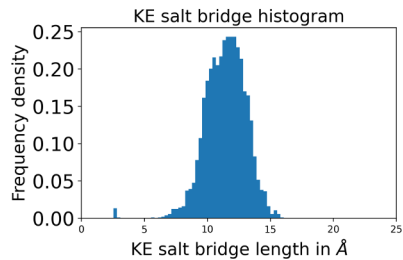

DFG flip

C207(C $\alpha$ )-C207(C $\beta$ )-D208(C $\alpha$ )-D208(C $\gamma$ )

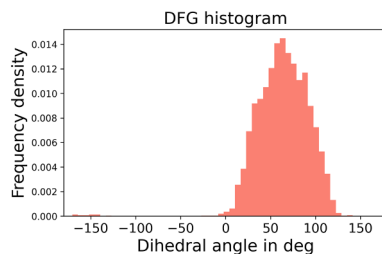

Hbond of A-loop

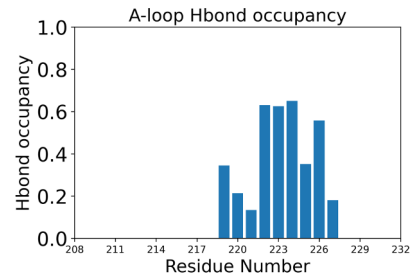

Feature

Free energy = 1.87 kcal/mol  
 Remarks: KE salt bridge broken(I)  
 DFG mid(I/A)  
 (Din,up, Fmid)  
 A-loop partially helical(I)

Zone 8

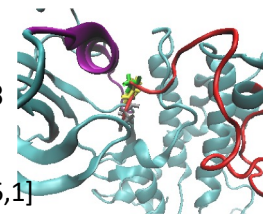

[1,0.5,1]

KE salt bridge histogram

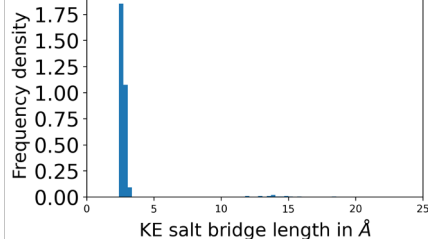

DFG histogram

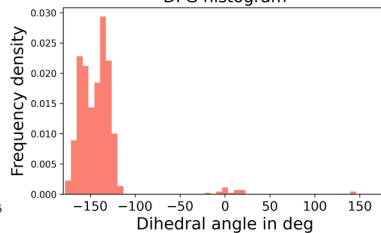

A-loop Hbond occupancy

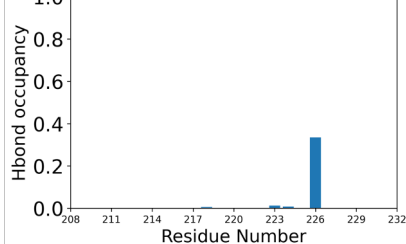

Free energy = 8.4 kcal/mol  
 Remarks: KE salt bridge formed(A)  
 DFG mid(I/A)  
 (Din,low, Fmid)  
 A-loop extended(A)

Zone 9

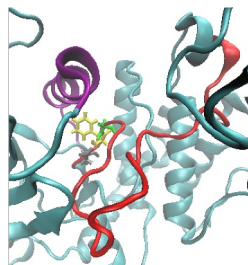

[1,0.5,1]

KE salt bridge histogram

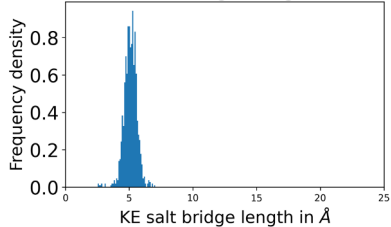

DFG histogram

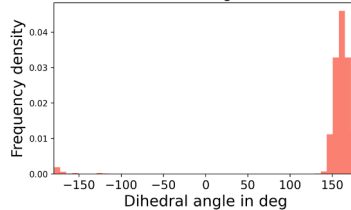

A-loop Hbond occupancy

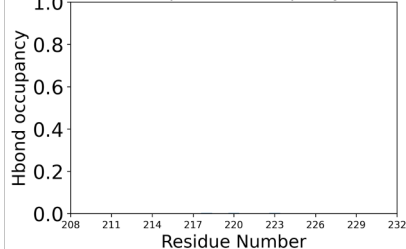

Free energy = 5.23 kcal/mol  
 Remarks: KE salt bridge formed(A)  
 DFG mid(I/A)  
 (Din,low, Fin)  
 A-loop extended(A)

Note: (I) denotes inactive feature and (A) denotes active feature

Structure from zone

KE salt bridge histogram

 DFG flip  
 C207(C $\alpha$ )-C207(C $\beta$ )-D208(C $\alpha$ )-D208(C $\gamma$ )

Hbond of A-loop

Feature

Zone I0

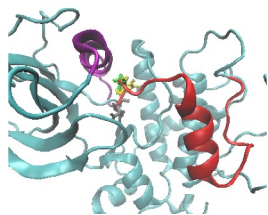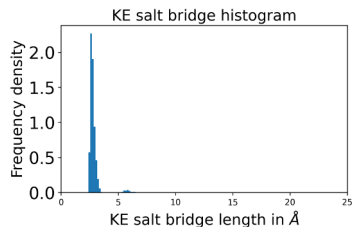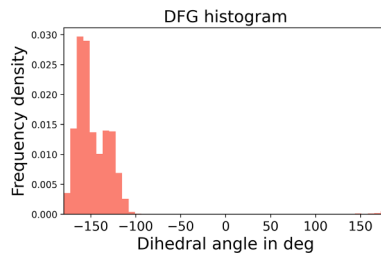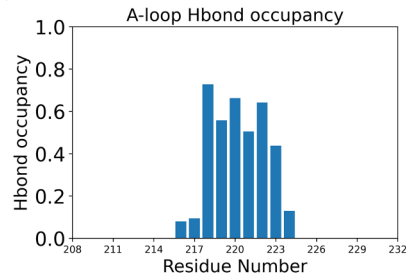

Free energy = 6.92 kcal/mol  
 Remarks: KE salt bridge formed(A)  
 DFG in(A) (Din,low, Fout)  
 A-loop partially helical(I)

[1,1,0]

Zone I1

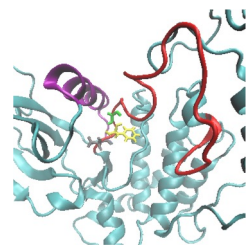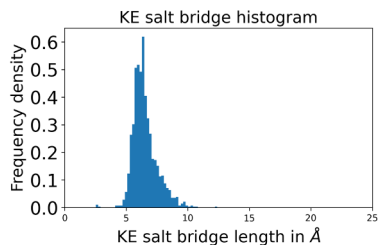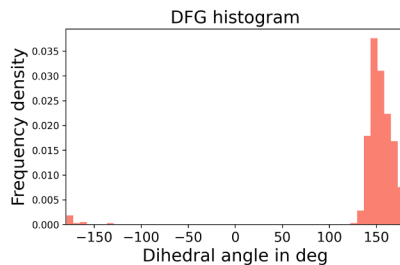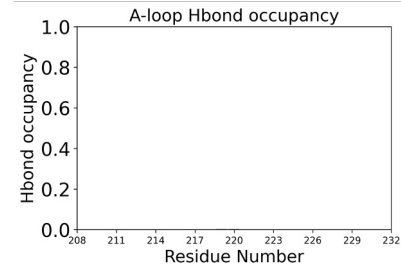

Free energy = 11.37 kcal/mol  
 Remarks: Most active  
 KE salt bridge formed(A)  
 DFG in(A) (Din,low, Fout)  
 A-loop extended(A)

[1,1,1]

Zone I2

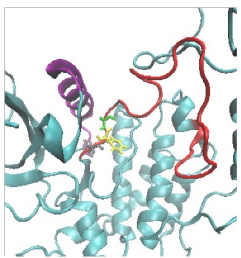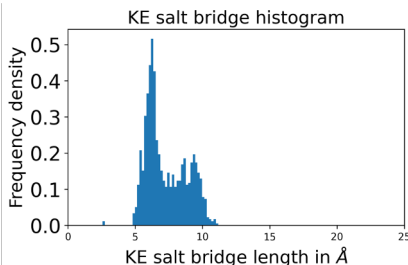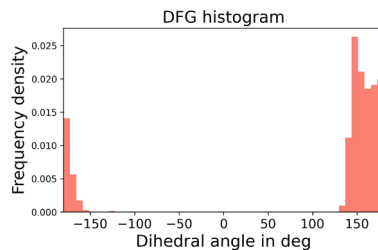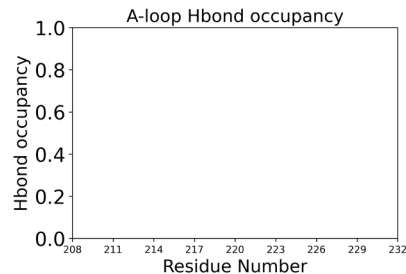

Free energy = 11.98 kcal/mol  
 Remarks: KE salt bridge formed(A)  
 DFG in(A) (Din,low, Fout)  
 A-loop extended(A)

[1,1,1]

**MEK\_SSDD**

Structure from zone

KE salt bridge histogram

DFG flip

C207(C $\alpha$ )-C207(C $\beta$ )-D208(C $\alpha$ )-D208(C $\gamma$ )

Hbond of A-loop

Feature

Zone 13

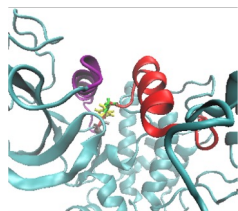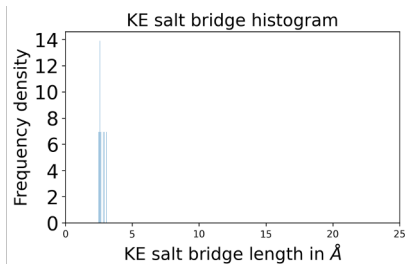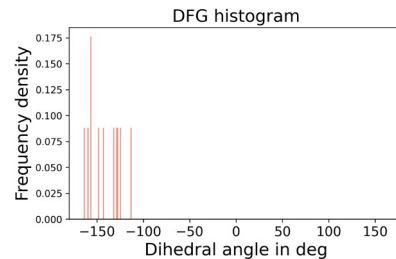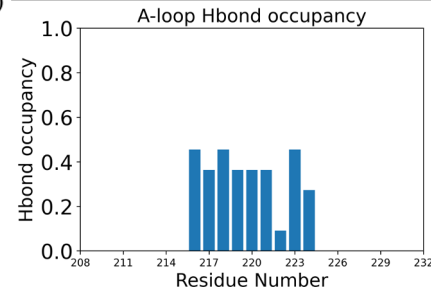

Free energy = 11.72 kcal/mol  
Remarks: KE salt bridge formed(A)  
DFG in(A) (Din,low, Fout)  
A-loop partially helical(I)

Zone 14

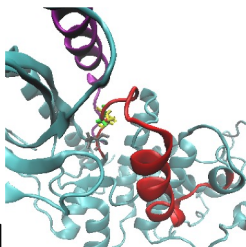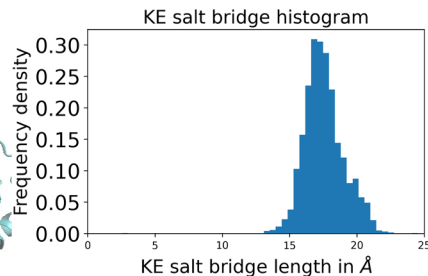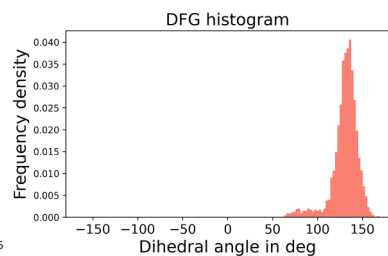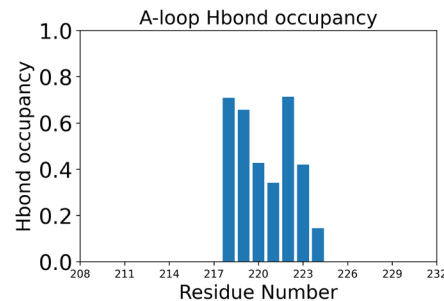

Free energy = 12.19 kcal/mol  
Remarks: KE salt bridge formed(I)  
DFG mid(I/A) (Din,low, Fin)  
A-loop partially helical(I)

Zone 15

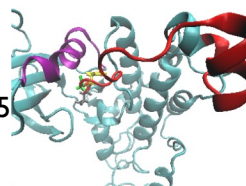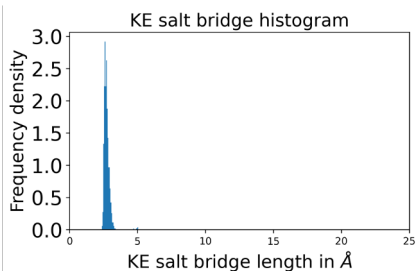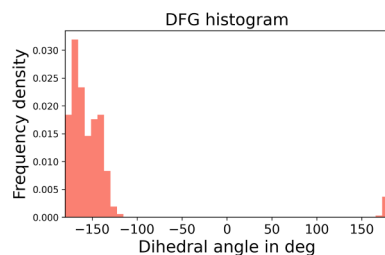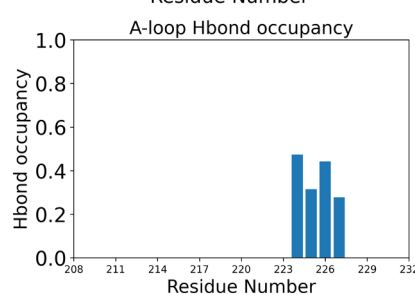

Free energy = 11.98 kcal/mol  
Remarks: KE salt bridge formed(A)  
DFG in(A) (Din,low, Fout)  
A-loop partially helical(I)

Note: (I) denotes inactive feature and (A) denotes active feature

**Fig. S4: MEK1 SSDD structures and their structural characteristics across zones**

Structure from zone

KE salt bridge histogram

DFG flip  
C207(C $\alpha$ )-C207(C $\beta$ )-D208(C $\alpha$ )-D208(C $\gamma$ )

Hbond of A-loop

Feature

Zone 1

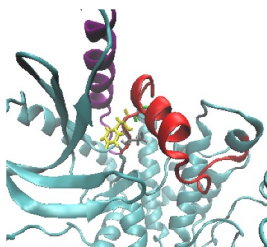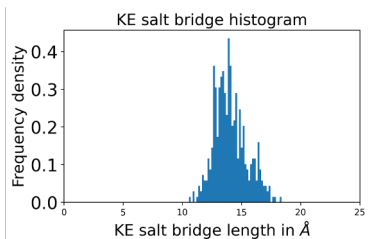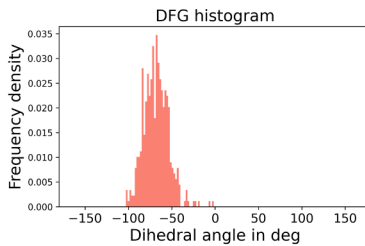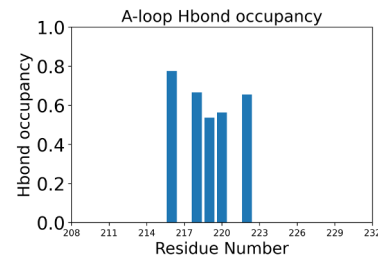

Free energy = 3.70 kcal/mol  
Remarks: **Most Inactive**  
KE salt bridge broken(I)  
DFG out(I)  
**(Dout,low, Fin)**  
A-loop partially helical(I)

Zone 2

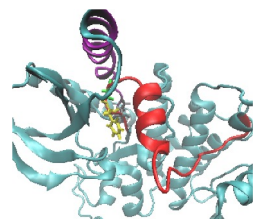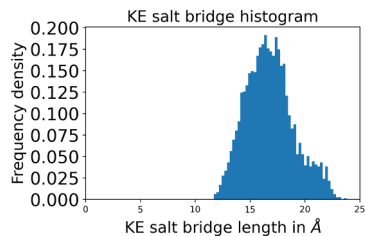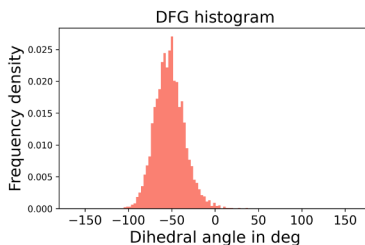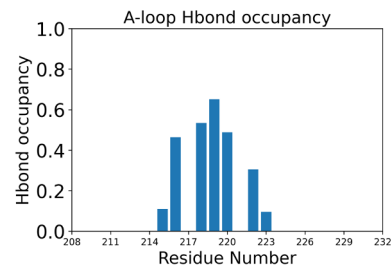

Free energy = 1.39 kcal/mol  
Remarks: KE salt bridge broken(I)  
DFG out(I) **(Dout,up, Fin)**  
A-loop partially unfolded(I/A)

Zone 3

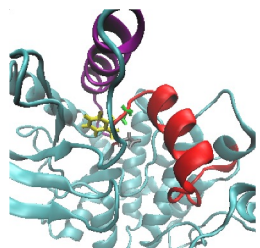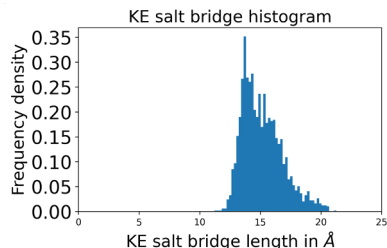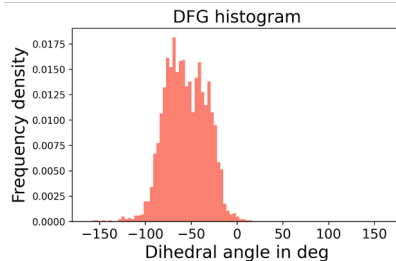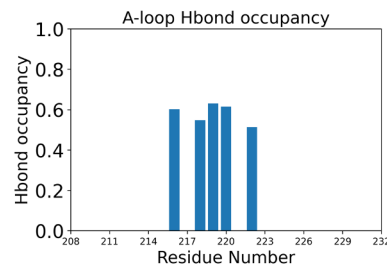

Free energy = 1.45 kcal/mol  
Remarks:  
KE salt bridge broken(I)  
DFG out(I)  
**(Dout,low, Fin)**  
A-loop partially helical(I)

Structure from zone

KE salt bridge histogram

DFG flip  
C207(C $\alpha$ )-C207(C $\beta$ )-D208(C $\alpha$ )-D208(C $\gamma$ )

Hbond of A-loop

Feature

Zone 4

[0,0,0.5]

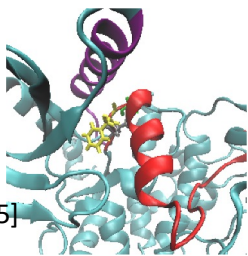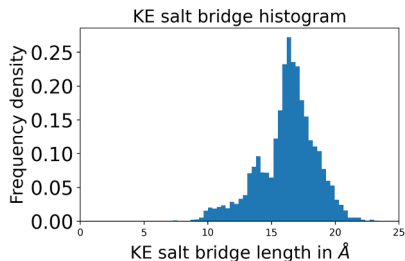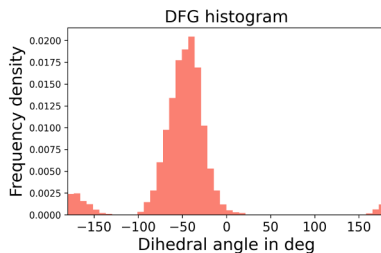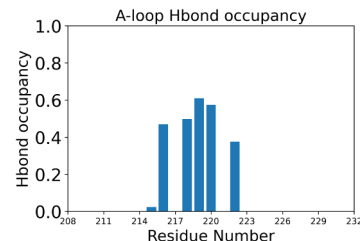

Free energy = 0.49 kcal/mol  
Remarks: **Most Stable**  
KE salt bridge broken(**I**)  
DFG out(**I**) (**Dout,up, Fin**)  
A-loop partially helical(**I**)

Zone 5

[0,0,0.5]

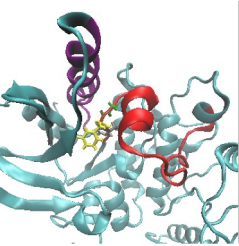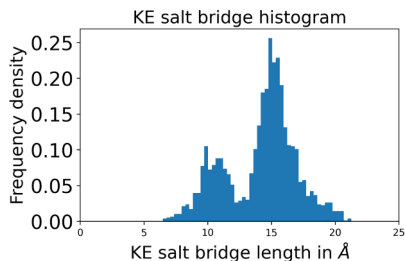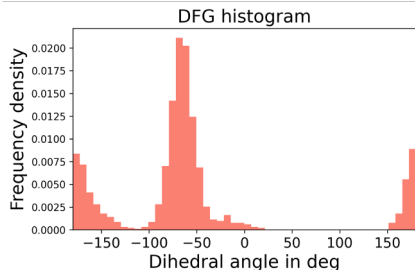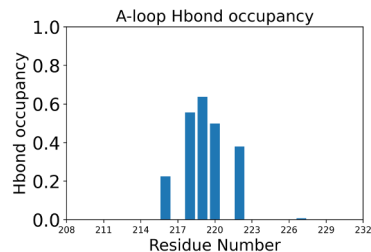

Free energy = 4.23 kcal/mol  
Remarks: KE salt bridge broken(**I**)  
DFG out(**I**) (**Dout,low, Fin**)  
A-loop partially helical(**I**)

Zone 6

[0.5,0.5,1]

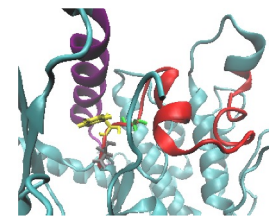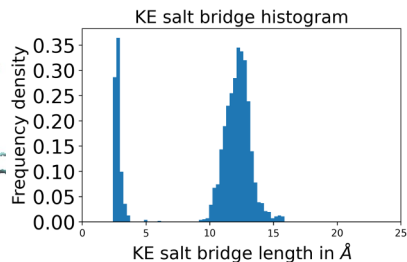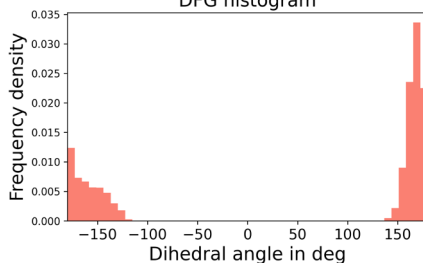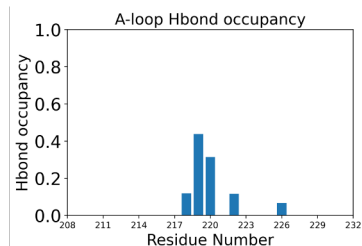

Free energy = 3.19 kcal/mol  
Remarks:  
KE salt bridge formed/broken(**I/A**)  
DFG mid(**I**) (**Din,low, Fin**)  
A-loop unfolded(**A**)

Structure from zone

KE salt bridge histogram

DFG flip  
C207(C $\alpha$ )-C207(C $\beta$ )-D208(C $\alpha$ )-D208(C $\gamma$ )

Hbond of A-loop

Feature

Zone 7

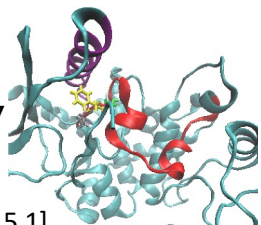

[0.5,0.5,1]

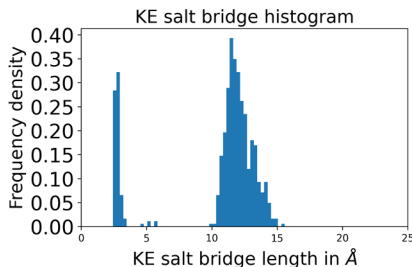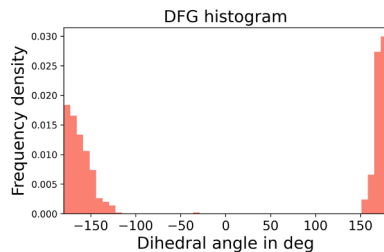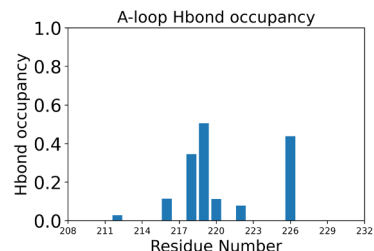

Free energy = 4.45 kcal/mol  
Remarks:  
KE salt bridge broken/formed(I/A)  
DFG mid(I/A)  
**(Din,low, Fin)**  
A-loop unfolded(A)

Zone 8

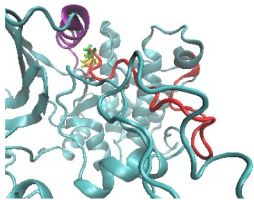

[1,1,1]

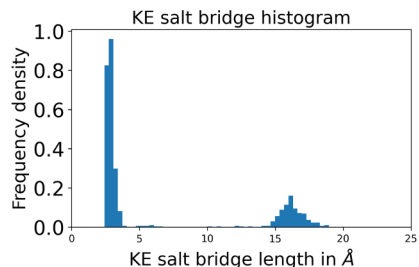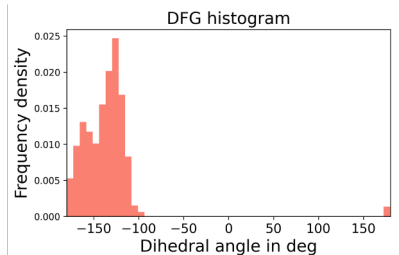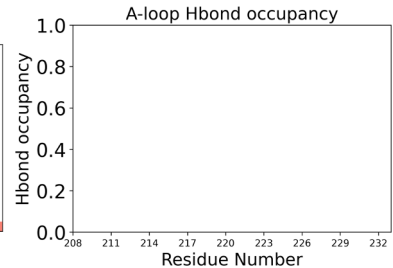

Free energy = 9.14 kcal/mol  
Remarks: KE salt bridge formed(A)  
DFG in(A) **(Dout,low, Fin)**  
A-loop unfolded(A)

Zone 9

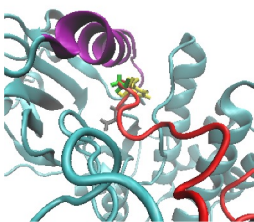

[1,1,1]

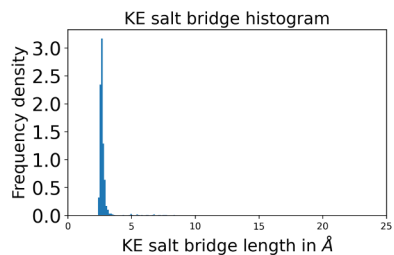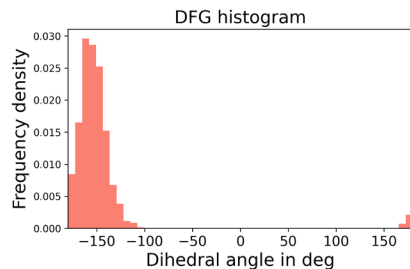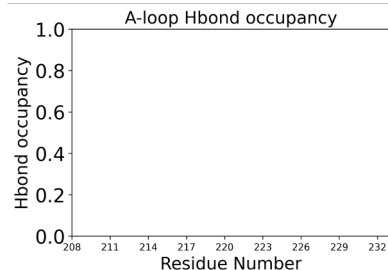

Free energy = 8.64 kcal/mol  
Remarks: **Most Active**  
KE salt bridge formed(A)  
DFG in (A) **(Din,low, Fout)**  
A-loop unfolded(A)

Structure from zone

KE salt bridge histogram

DFG flip  
C207(C $\alpha$ )-C207(C $\beta$ )-D208(C $\alpha$ )-D208(C $\gamma$ )

Hbond of A-loop

Feature

Zone I0

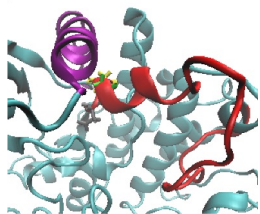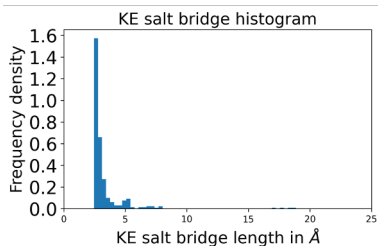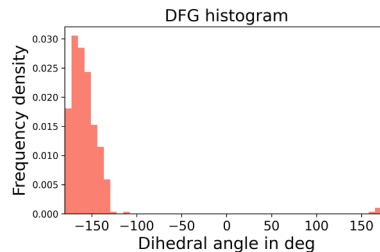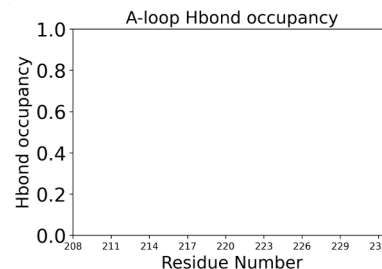

Free energy = 9.24 kcal/mol  
Remarks  
KE salt bridge formed(**A**)  
DFG in(**A**) (**Din,low, Fout**)  
A-loop unfolded(**A**)

[1,1,1]

Zone II

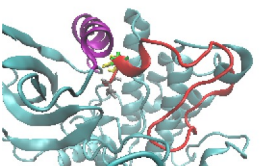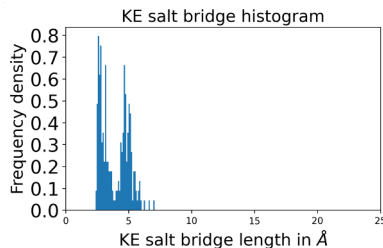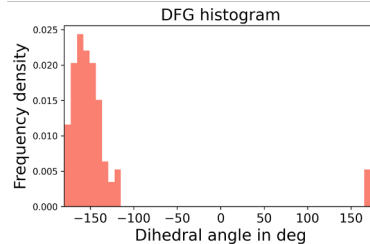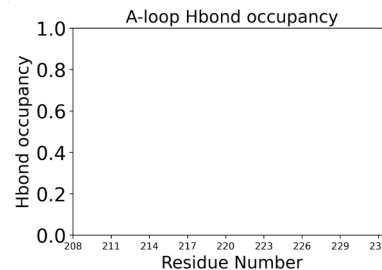

Free energy = 8.6 kcal/mol  
Remarks: KE salt bridge formed(**A**)  
DFG in (**A**) (**Din,low, Fout**)  
A-loop unfolded(**A**)

PS note: (**I**) denotes inactive feature and (**A**) denotes active feature

**Fig. S5: MEK1 diphosphorylated structures and their structural characteristics across zones**

**MEK\_F53S**

Structure from zone

KE salt bridge histogram

DFG flip  
C207(C $\alpha$ )-C207(C $\beta$ )-D208(C $\alpha$ )-D208(C $\gamma$ )

Hbond of A-loop

Feature

Zone 1

[0.5,0.5,0.5]

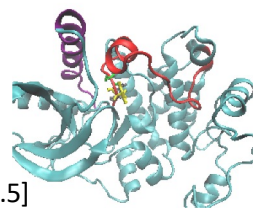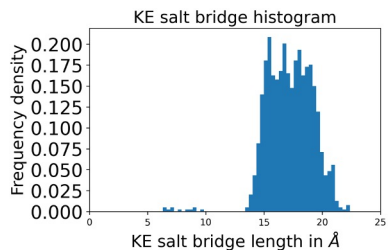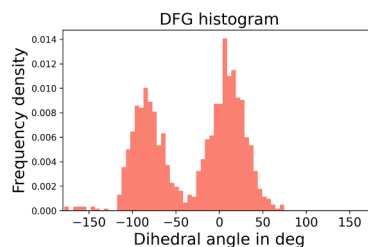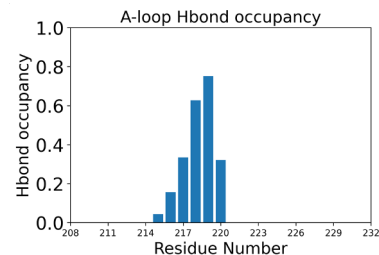

Free energy = 1.83 kcal/mol  
 Remarks: **Most Stable**  
 KE salt bridge broken(**I**)  
 DFG mid(**I/A**)  
 (Dout,up, Fout)  
 A-loop partially unfolded(**I/A**)

Zone 2

[0.5,0,0.5]

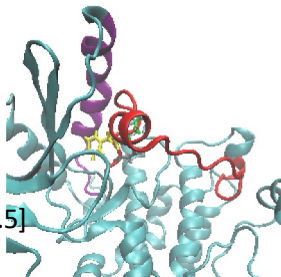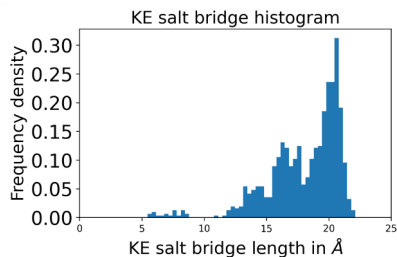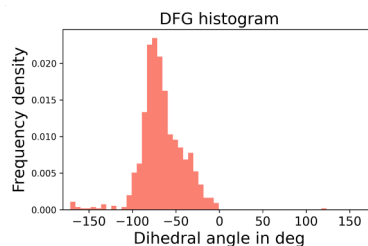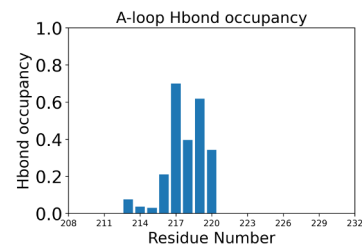

Free energy = 11.83 kcal/mol  
 Remarks: KE salt bridge broken(**I**)  
 DFG out(**I**)  
 (Dout,low, Fin)  
 A-loop partially unfolded(**I/A**)

Zone 3

[1,1,1]

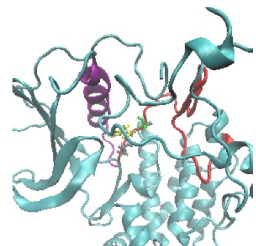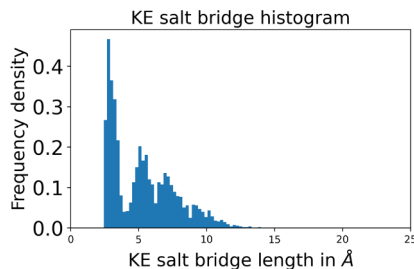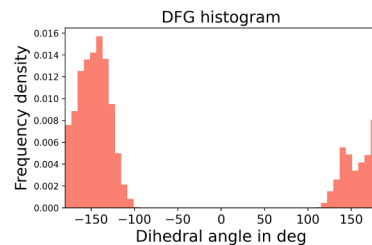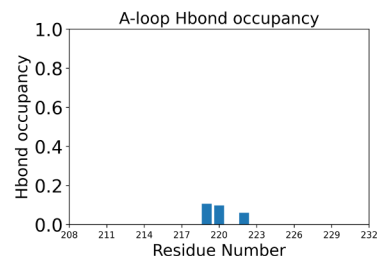

Free energy = 13.76 kcal/mol  
 Remarks: **Most Active**  
 KE salt bridge formed(**A**)  
 DFG in(**A**) (Din,low, Fout)  
 A-loop unfolded(**A**)

PS note: (**I**) denotes inactive feature and (**A**) denotes active feature



# MEK\_F53S

Structure from zone

Zone 4

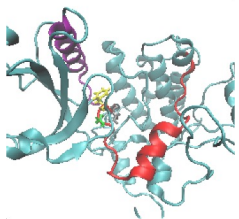

KE salt bridge histogram

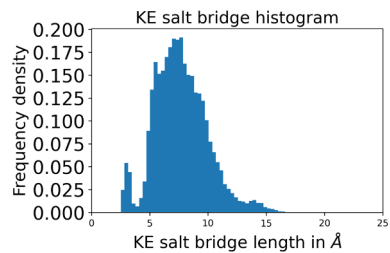

DFG flip

C207(C $\alpha$ )-C207(C $\beta$ )-D208(C $\alpha$ )-D208(C $\gamma$ )

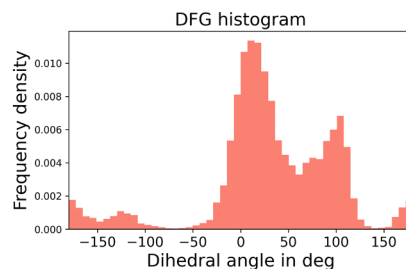

Hbond of A-loop

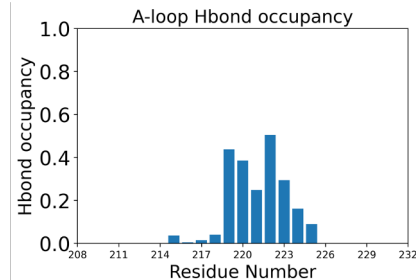

Feature

Free energy = 12.11 kcal/mol  
Remarks: **Most Inactive**  
KE salt bridge broken **(I)**  
DFG out **(I)**  
**(Dout, low, Fin)**  
A-loop partially helical **(I)**

[0.5,0,0]

Fig. S6: MEK1 F53S structures and their structural characteristics across zones

**MEK\_E203K**

Structure from zone

KE salt bridge histogram

DFG flip  
C207(C $\alpha$ )-C207(C $\beta$ )-D208(C $\alpha$ )-D208(C $\gamma$ )

Hbond of A-loop

Feature

Zone 1

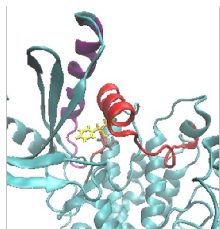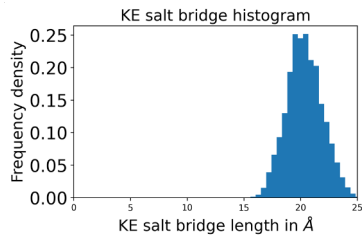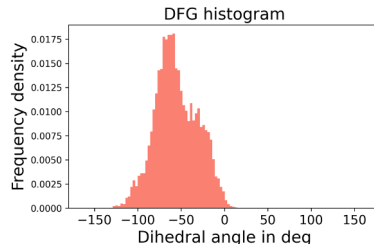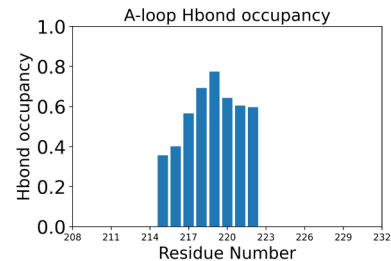

Free energy = 2.59 kcal/mol  
Remarks: **Most Inactive**  
KE salt bridge broken(I)  
DFG out(I)  
**(Dout,low, Fin)**  
A-loop partially helical(I)

Zone 2

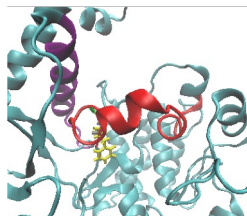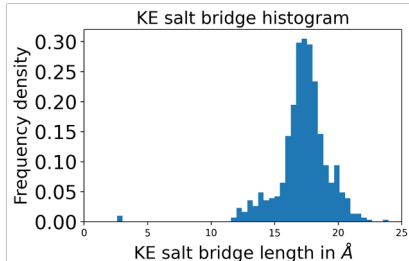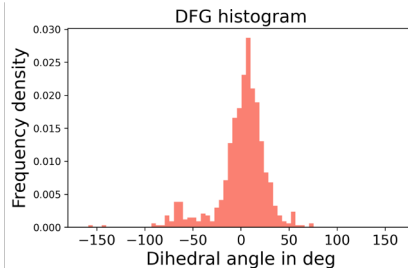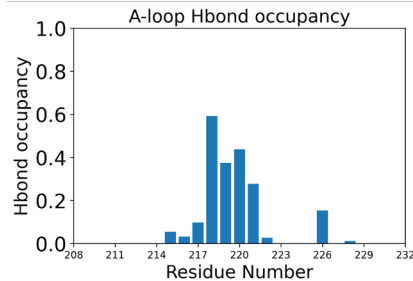

Free energy = 5.71 kcal/mol  
Remarks: KE salt bridge broken(I)  
DFG mid(I/A)  
**(Dout,low, Fout)**  
A-loop partially helical(I)

Zone 3

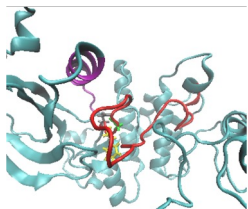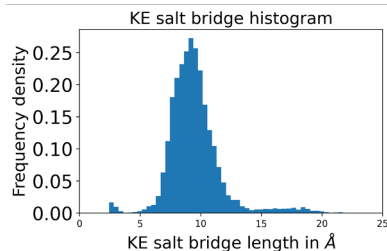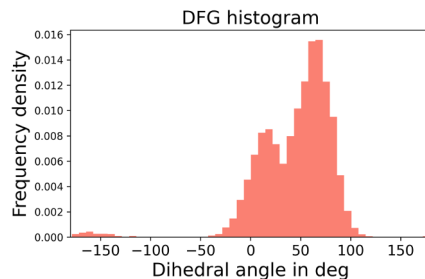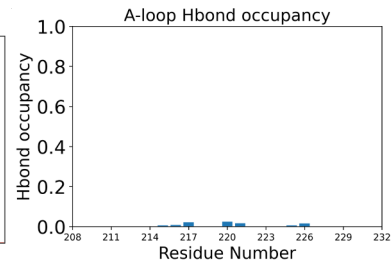

Free energy = 1.11 kcal/mol  
Remarks: **Most Stable**  
KE salt bridge broken(I)  
DFG mid(I/A)  
**(Dout,up, Fout)**  
A-loop unfolded(A)

Note: (I) denotes inactive feature and (A) denotes active feature

**MEK\_E203K**

Structure from zone

Zone 4

[1,1,1]

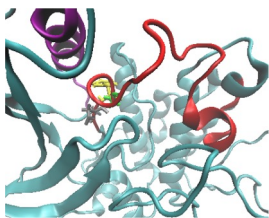

KE salt bridge histogram

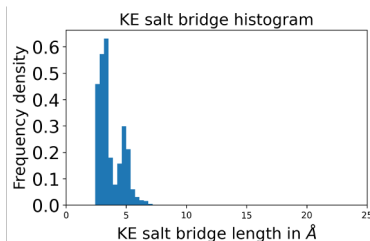

DFG flip

C207(C $\alpha$ )-C207(C $\beta$ )-D208(C $\alpha$ )-D208(C $\gamma$ )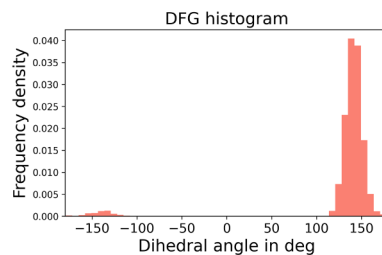

Hbond of A-loop

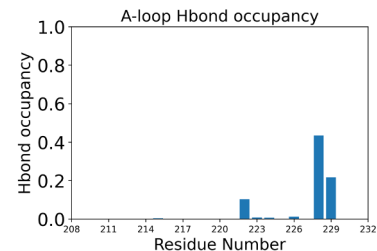

Feature

Free energy = 3.64 kcal/mol  
 Remarks: **Most Active**  
 KE salt bridge formed(**A**)  
 DFG in(**A**) (**Din,low, Fout**)  
 A-loop unfolded(**A**)

Zone 5

[0,0.5,1]

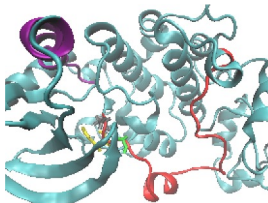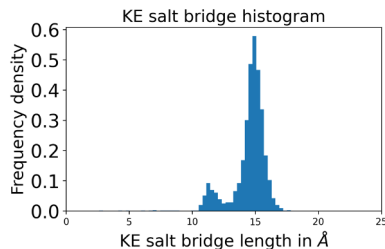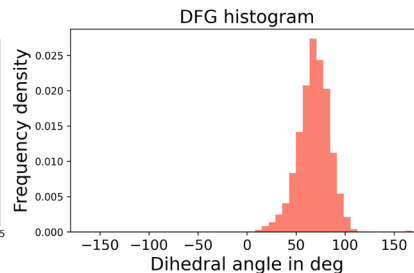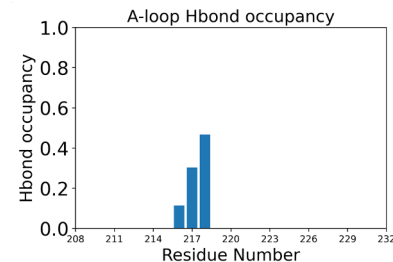

Free energy = 6.0 kcal/mol  
 Remarks: KE salt bridge broken(**I**)  
 DFG mid(**I/A**)  
 (**Din,up, Fin**)  
 A-loop unfolded(**A**)

Note: (**I**) denotes inactive feature and (**A**) denotes active feature

**Fig. S7: MEK1 E203K structures and their structural characteristics across zones**

WT:

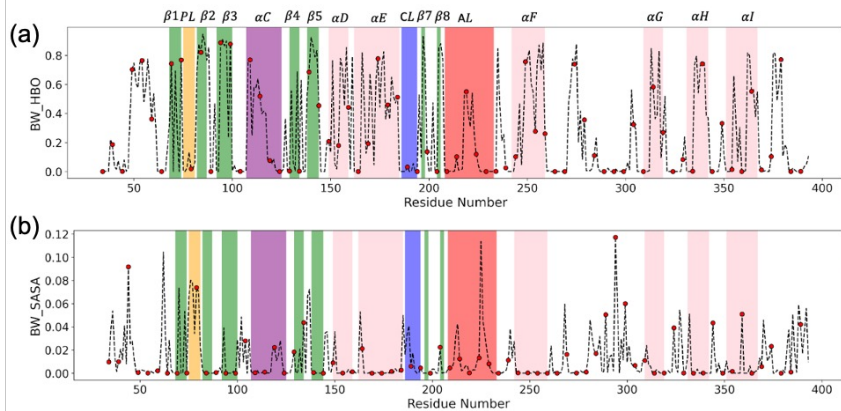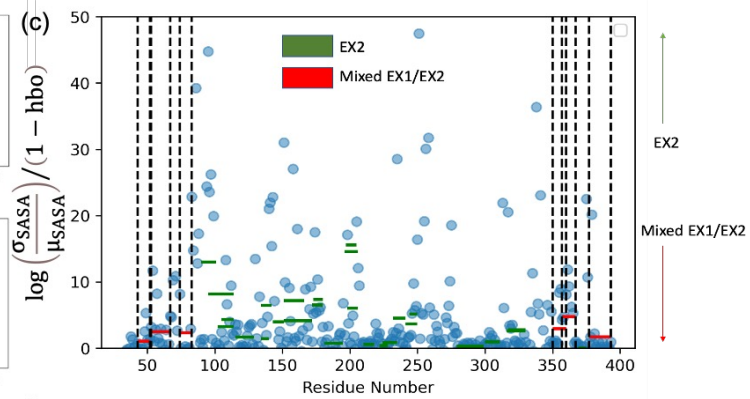

**SSDD:**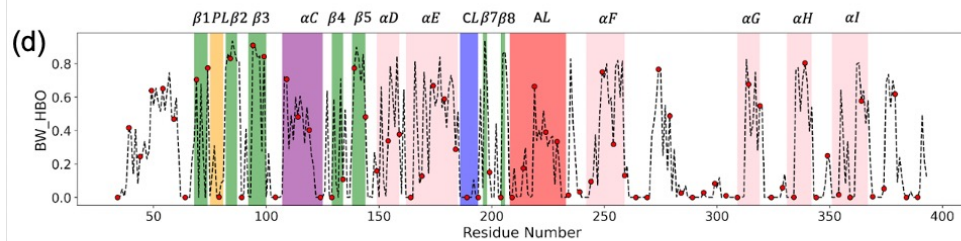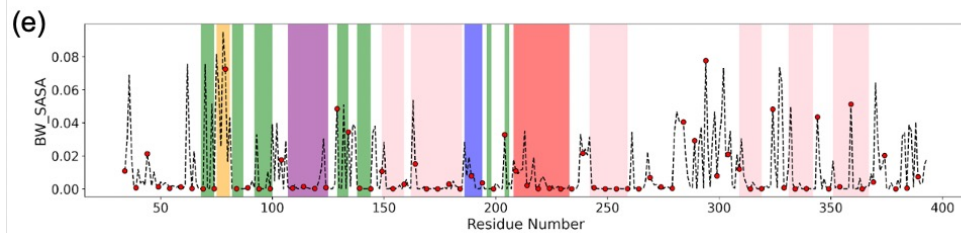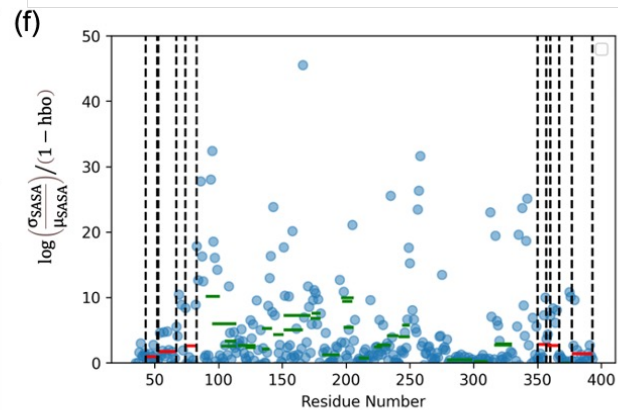

**E203K:**

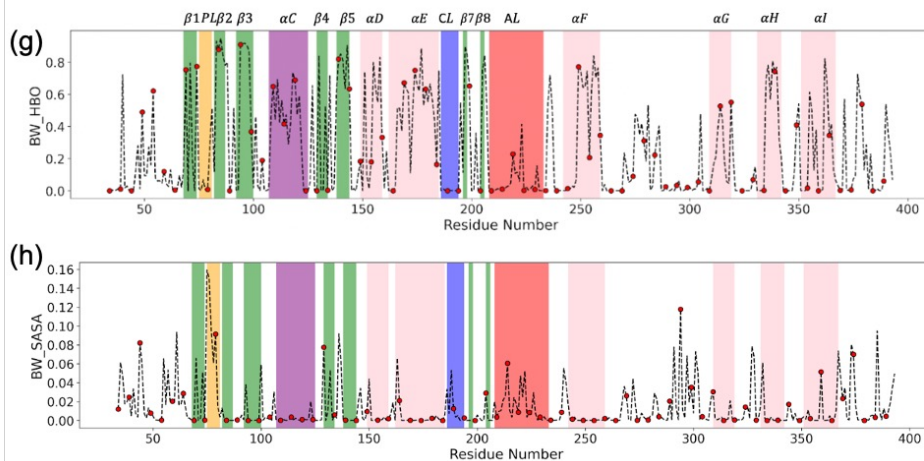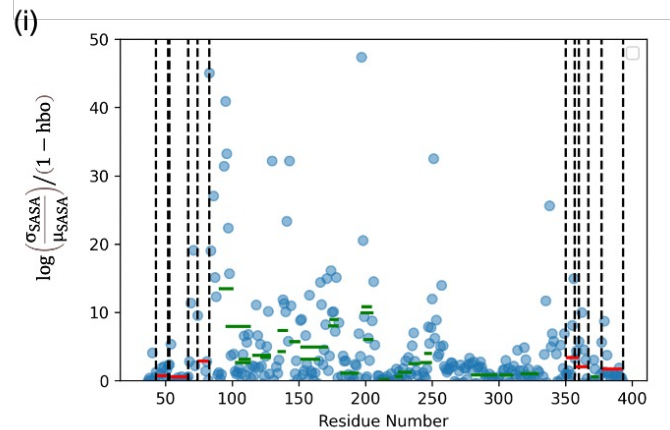

**Fig. S8: Boltzmann weighted Hydrogen bond occupancy (BW-HB) in panels (a,d,g) and SASA (BW-SASA) in panels (b,e,h). Metric to compute the tendency of a peptide to have EX2 Vs Mixed EX1/EX2 exchange kinetics demonstrated for MEK1 WT:  $\log_{10}(\text{norm standard deviation(SASA)})/(1 - \text{hydrogen bond occupancy})$  in panels (c,f,i) for MEK WT, SSDD and E203K systems.**

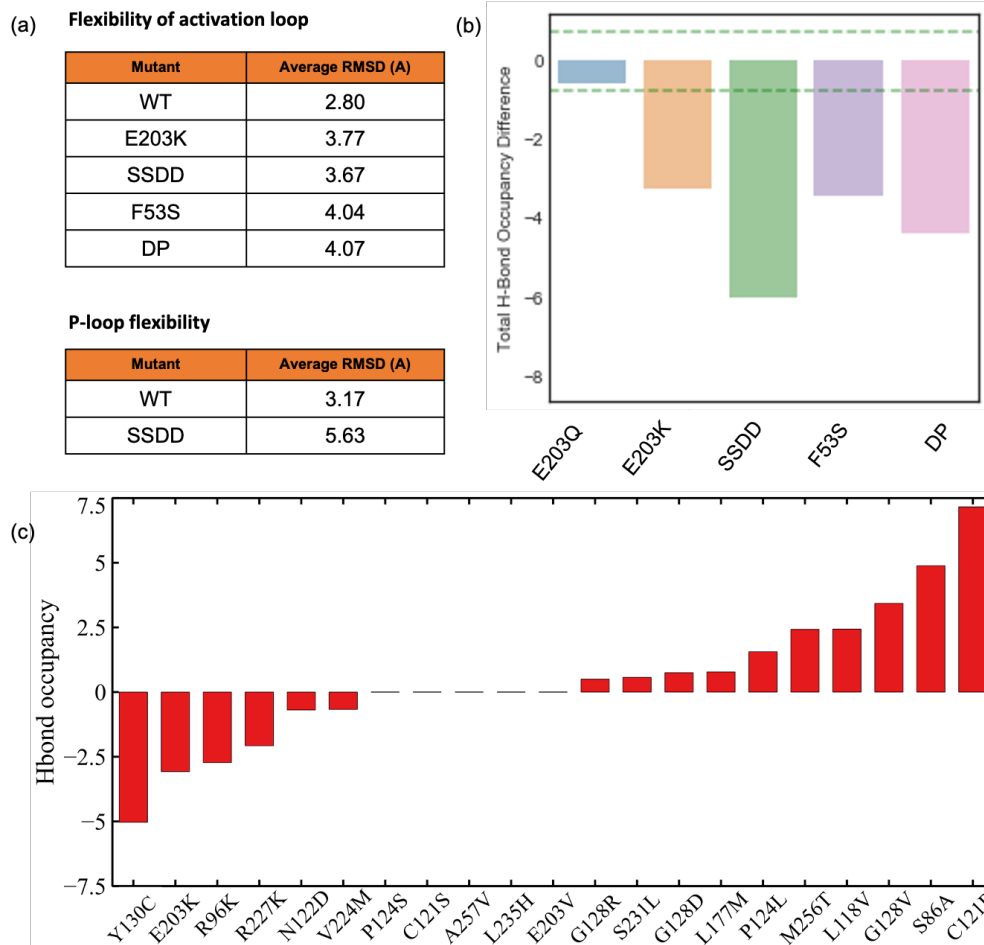

**Fig. S9: Average RMSD of MEK1 systems wrt key subdomains: A-loop and P-loop, (a). Hydrogen bond occupancy difference in A-loop and  $\alpha$ C-helix between MEK1 variant and MEK1 WT (b). Plot of accumulated hydrogen bond occupancy in the  $\alpha$ C-helix domain and A-loop of MEK1 for inactive conformations. (Threshold 0.5) in panels (c).**

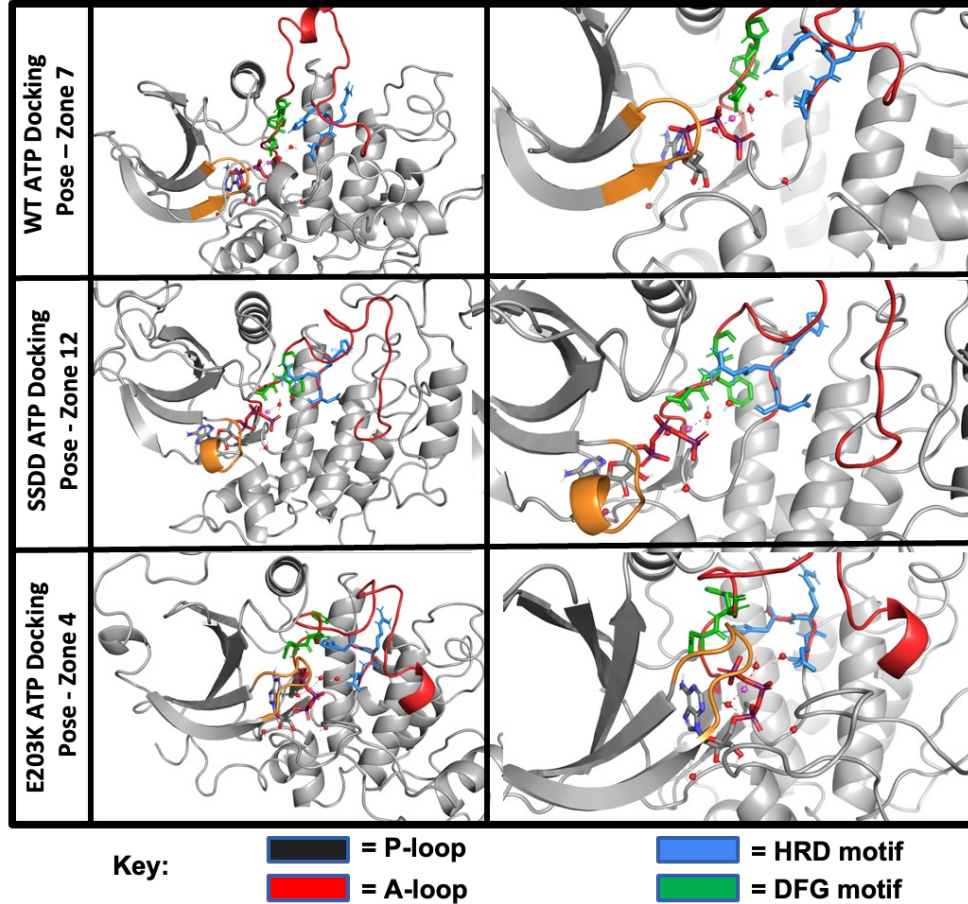

**Fig. S10:** Molecular docking poses (kinase and binding site views) of ATP binding to MEK1: (top) WT, (middle) SSDD, (bottom) E203K. In addition to the conserved interactions between the ATP and the protein being preserved, the  $Mg^{2+}$  ion and water molecules mediate critical interactions with the protein.



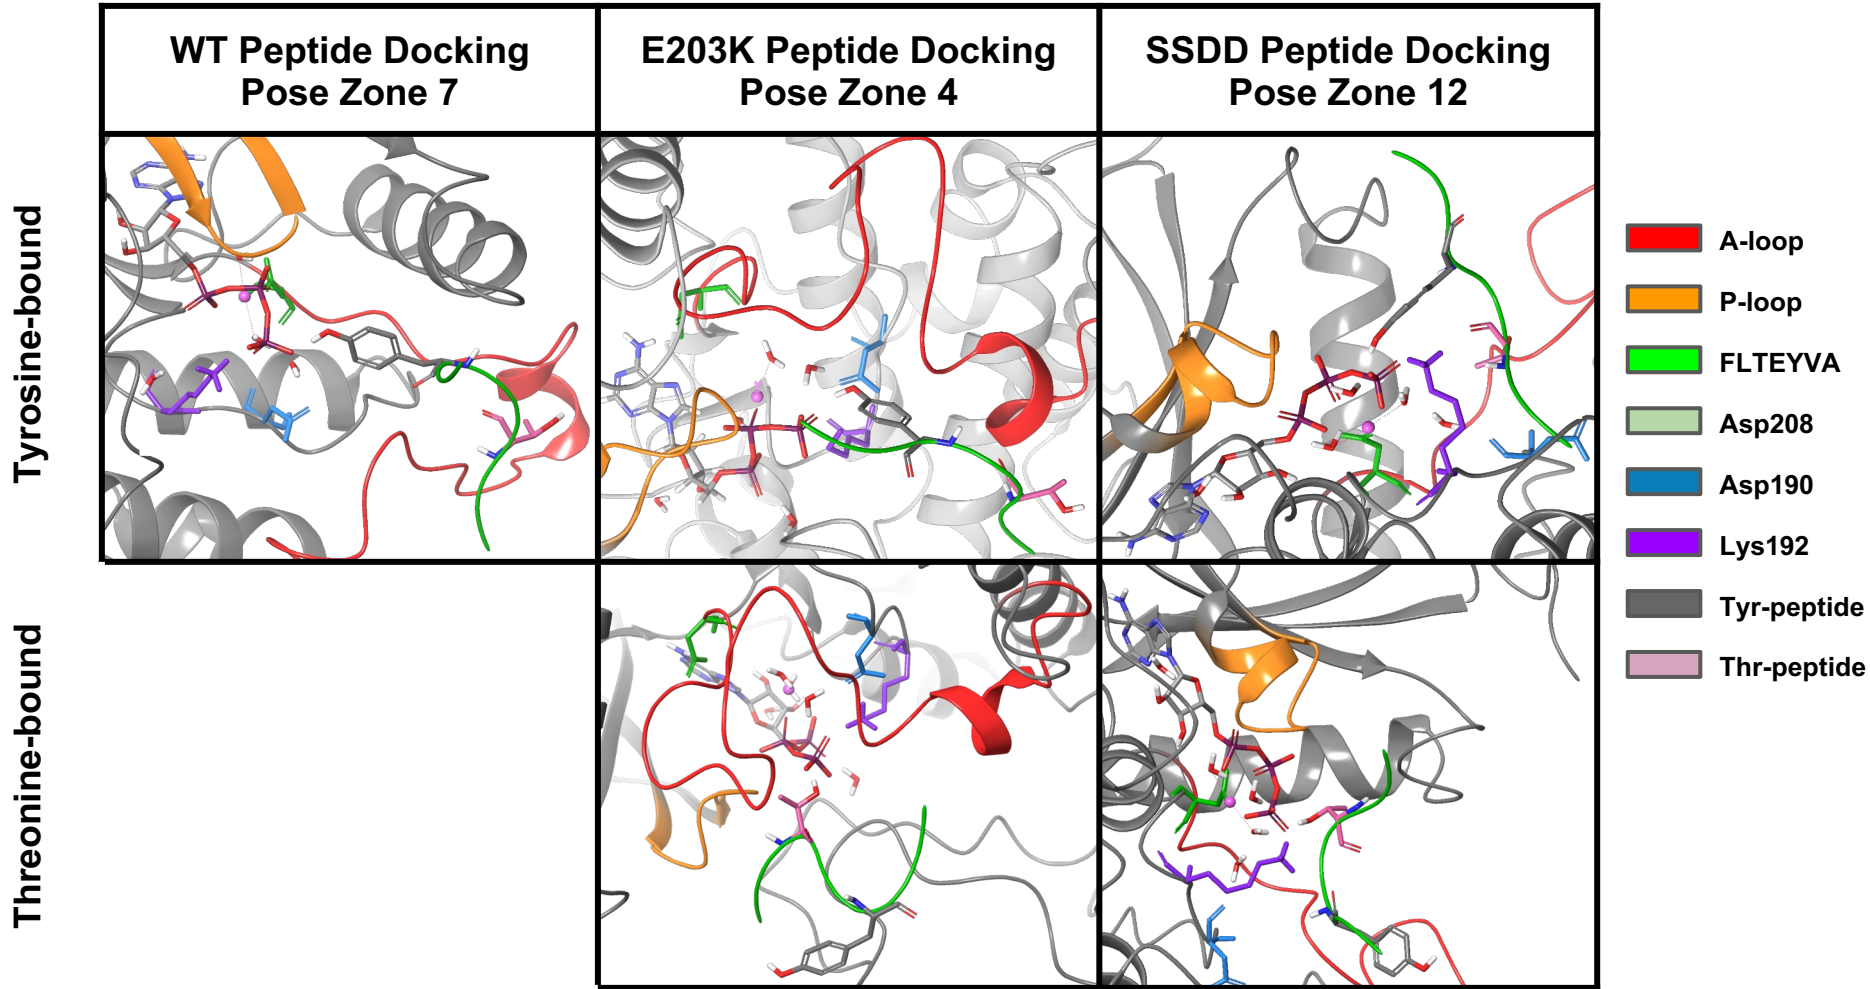

Fig. S11: Molecular docking poses (binding site view) of FLTEYVA to most active zones of MEK1 variants: (left) WT, (middle) E203K, (right) SSDD. Transition states of both Tyr (top) and Thr (bottom) phosphorylation were modeled in the reaction competent zones.

**WT  
Zone1**

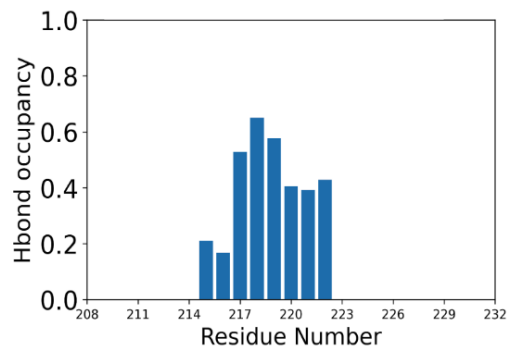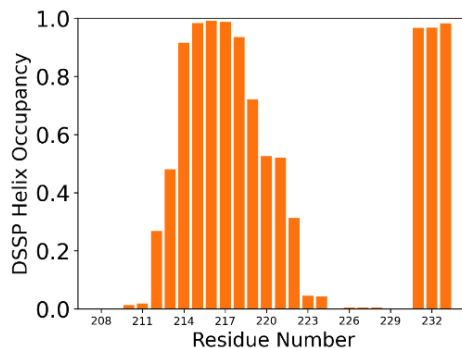

**SSDD  
Zone1**

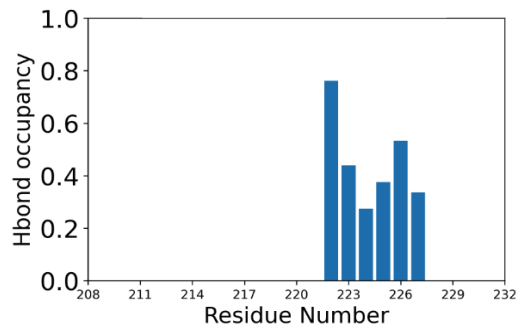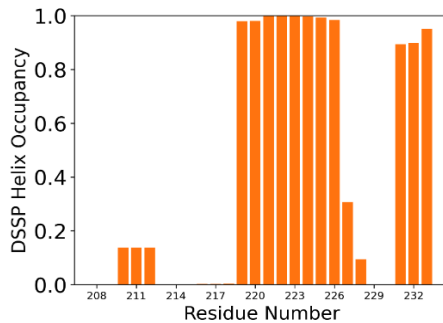

**E203K  
Zone1**

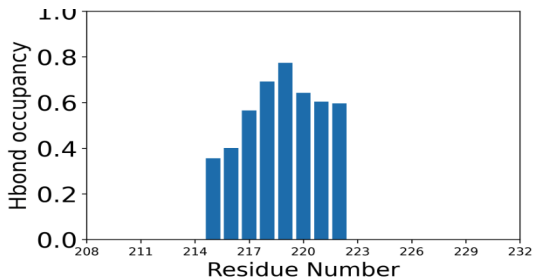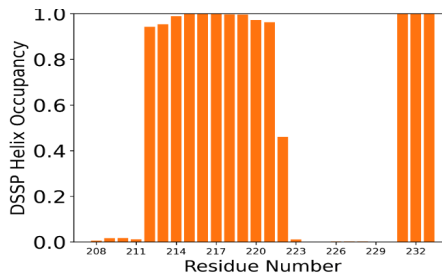

**Fig. S12: Comparison of hydrogen bonding and DSSP analysis for zone 1 of 3 MEK1 variants. The results show qualitative similarity between the two analyses.**

### a. WT ATP Docking Results

| STRUCTURE | ZONE INFO                                                                | FREE ENERGY (KCAL/MOL) | BINDING AFFINITY (KCAL/MOL) | MG <sup>2+</sup> COORDINATION | D208 – MG <sup>2+</sup> DISTANCE (Å) | ADENOSINE H-BONDS | REACTION COMPETENT? |
|-----------|--------------------------------------------------------------------------|------------------------|-----------------------------|-------------------------------|--------------------------------------|-------------------|---------------------|
| Zone 1    | 1. KE salt bridge broken<br>2. DFG out<br>3. A-loop partially helical    | 0.66                   | -18.472                     | ✓                             | 9.81                                 | ✓                 | ✗                   |
| Zone 2    | 1. KE salt bridge broken<br>2. DFG in<br>3. A-loop partially helical     | 2.35                   | -16.841                     | ✓                             | 1.39                                 | ✓                 | ✓                   |
| Zone 3    | 1. KE salt bridge broken<br>2. DFG in<br>3. A-loop partially helical     | 6.28                   | -15.432                     | ✓                             | 1.23                                 | ✓                 | ✓                   |
| Zone 4    | 1. KE salt bridge broken<br>2. DFG in<br>3. A-loop unfolded              | 11.62                  | -14.846                     | ✓                             | 1.96                                 | ✓                 | ✓                   |
| Zone 5    | 1. KE salt bridge broken<br>2. DFG in/out<br>3. A-loop partially helical | 5.08                   | -15.967                     | ✓                             | 1.40                                 | ✓                 | ✓                   |
| Zone 7    | 1. KE salt bridge partly intact<br>2. DFG in<br>3. A-loop unfolded       | 13.6                   | -20.327                     | ✓                             | 2.12                                 | ✓                 | ✓                   |

## b. SDD ATP Docking Results

| STRUCTURE      | ZONE INFO                                                                | FREE ENERGY (KCAL/MOL) | BINDING AFFINITY (KCAL/MOL) | MG <sup>2+</sup> COORDINATION | D208 – MG <sup>2+</sup> DISTANCE (Å) | ADENOSINE H-BONDS | REACTION COMPETENT? |
|----------------|--------------------------------------------------------------------------|------------------------|-----------------------------|-------------------------------|--------------------------------------|-------------------|---------------------|
| <b>Zone 1</b>  | 1. KE salt bridge broken<br>2. DFG out<br>3. A-loop partially helical    | 3.46                   | -13.482                     | ✓                             | 2.05                                 | ✗                 | ✗                   |
| <b>Zone 3</b>  | 1. KE salt bridge broken<br>2. DFG out<br>3. A-loop partially helical    | 0.77                   | -14.462                     | ✓                             | 5.53                                 | ✗                 | ✗                   |
| <b>Zone 4</b>  | 1. KE salt bridge broken<br>2. DFG out<br>3. A-loop partially helical    | 0.9                    | -16.956                     | ✓                             | 7.06                                 | ✗                 | ✗                   |
| <b>Zone 5</b>  | 1. KE salt bridge broken<br>2. DFG in/out<br>3. A-loop partially helical | 1.22                   | -16.984                     | ✓                             | 10.44                                | ✓                 | ✗                   |
| <b>Zone 6</b>  | 1. KE salt bridge broken<br>2. DFG in<br>3. A-loop partially helical     | 0.85                   | -16.742                     | ✓                             | 8.82                                 | ✓                 | ✗                   |
| <b>Zone 7</b>  | 1. KE salt bridge broken<br>2. DFG in<br>3. A-loop partially helical     | 1.87                   | -15.245                     | ✓                             | 6.62                                 | ✗                 | ✗                   |
| <b>Zone 9</b>  | 1. KE salt bridge formed<br>2. DFG in<br>3. A-loop unfolded              | 5.23                   | -15.258                     | ✓                             | 2.03                                 | ✓                 | ✓                   |
| <b>Zone 10</b> | 1. KE salt bridge formed<br>2. DFG in<br>3. A-loop partially helical     | 6.92                   | -14.138                     | ✗                             | 3.39                                 | ✓                 | ✗                   |
| <b>Zone 11</b> | 1. KE salt bridge partly formed<br>2. DFG in<br>3. A-loop unfolded       | 11.37                  | -13.656                     | ✓                             | 4.85                                 | ✗                 | ✗                   |
| <b>Zone 12</b> | 1. KE salt bridge partly formed<br>2. DFG in<br>3. A-loop unfolded       | 11.98                  | -18.038                     | ✓                             | 2.00                                 | ✓                 | ✓                   |

### c. E203K ATP Docking Results

| STRUCTURE     | ZONE INFO                                                             | FREE ENERGY (KCAL/MOL) | BINDING AFFINITY (KCAL/MOL) | MG <sup>2+</sup> COORDINATION | D208 – MG <sup>2+</sup> DISTANCE (Å) | ADENOSINE H-BONDS | REACTION COMPETENT? |
|---------------|-----------------------------------------------------------------------|------------------------|-----------------------------|-------------------------------|--------------------------------------|-------------------|---------------------|
| <b>Zone 1</b> | 1. KE salt bridge broken<br>2. DFG out<br>3. A-loop partially helical | 2.59                   | -20.278                     | ✓                             | 5.21                                 | ✓                 | ✗                   |
| <b>Zone 2</b> | 1. KE salt bridge broken<br>2. DFG out<br>3. A-loop unfolded          | 5.72                   | -14.421                     | ✓                             | 7.68                                 | ✓                 | ✗                   |
| <b>Zone 3</b> | 1. KE salt bridge broken<br>2. DFG out<br>3. A-loop unfolded          | 1.07                   | -14.599                     | ✓                             | 8.09                                 | ✓                 | ✗                   |
| <b>Zone 4</b> | 1. KE salt bridge formed<br>1. DFG in<br>3. A-loop unfolded           | 3.64                   | -18.914                     | ✓                             | 6.23                                 | ✓                 | ✓                   |
| <b>Zone 5</b> | 1. KE salt bridge broken<br>2. DFG in/out<br>3. A-loop unfolded       | 6                      | -17.246                     | ✓                             | 5.25                                 | ✗                 | ✗                   |

**Table S1: Molecular docking of ATP to different zones of MEK1: (a) WT, (b) SSDD, (c) E203K.**

### a. WT Peptide Docking Results

| STRUCTURE | TYR-BOUND BINDING AFFINITY (KCAL/MOL) | THR-BOUND BINDING AFFINITY (KCAL/MOL) | REACTION COMPETENT? | TYR PHOSPHORYLATION COMPETENT? | THR PHOSPHORYLATION COMPETENT? |
|-----------|---------------------------------------|---------------------------------------|---------------------|--------------------------------|--------------------------------|
| Zone 1    | -                                     | -                                     | ✗                   | ✗                              | ✗                              |
| Zone 2    | -3.989                                | -                                     | ✓                   | ✓                              | ✗                              |
| Zone 3    | -5.872                                | -5.595                                | ✓                   | ✓                              | ✓                              |
| Zone 4    | -                                     | -6.442                                | ✓                   | ✗                              | ✓                              |
| Zone 5    | -4.821                                | -                                     | ✓                   | ✓                              | ✗                              |
| Zone 7    | -4.723                                | -                                     | ✓                   | ✓                              | ✗                              |

**b. SSDD Peptide Docking Results**

| STRUCTURE | TYR-BOUND BINDING AFFINITY (KCAL/MOL) | THR-BOUND BINDING AFFINITY (KCAL/MOL) | REACTION COMPETENT? | TYR PHOSPHORYLATION COMPETENT? | THR PHOSPHORYLATION COMPETENT? |
|-----------|---------------------------------------|---------------------------------------|---------------------|--------------------------------|--------------------------------|
| Zone 1    | -                                     | -                                     | ✗                   | ✗                              | ✗                              |
| Zone 3    | -6.151                                | -5.372                                | ✗                   | ✓                              | ✓                              |
| Zone 4    | -5.421                                | -5.001                                | ✗                   | ✓                              | ✓                              |
| Zone 5    | -                                     | -                                     | ✗                   | ✗                              | ✗                              |
| Zone 6    | -6.515                                | -6.649                                | ✗                   | ✓                              | ✓                              |
| Zone 7    | -4.518                                | -4.853                                | ✗                   | ✓                              | ✓                              |
| Zone 9    | -7.201                                | -6.548                                | ✓                   | ✓                              | ✓                              |
| Zone 10   | -                                     | -6.315                                | ✗                   | ✗                              | ✓                              |
| Zone 11   | -4.789                                | -6.396                                | ✗                   | ✓                              | ✓                              |
| Zone 12   | -6.466                                | -5.543                                | ✓                   | ✓                              | ✓                              |

### c. E203K Peptide Docking Results

| STRUCTURE | TYR-BOUND BINDING AFFINITY (KCAL/MOL) | THR-BOUND BINDING AFFINITY (KCAL/MOL) | REACTION COMPETENT? | TYR PHOSPHORYLATION COMPETENT? | THR PHOSPHORYLATION COMPETENT? |
|-----------|---------------------------------------|---------------------------------------|---------------------|--------------------------------|--------------------------------|
| Zone 1    | -1.007                                | -                                     | ✗                   | ✓                              | ✗                              |
| Zone 2    | -6.666                                | -6.447                                | ✗                   | ✓                              | ✓                              |
| Zone 3    | -5.414                                | -                                     | ✗                   | ✓                              | ✗                              |
| Zone 4    | -6.257                                | -4.580                                | ✓                   | ✓                              | ✓                              |
| Zone 5    | -5.678                                | -4.939                                | ✗                   | ✓                              | ✓                              |

**Table S2: Molecular docking of FLTEYVA peptide derived from ERK1 (PDB: 5UMO) to different zones of MEK1: (a) WT, (b) SSDD, (c) E203K.**
